# Supplementary material
Source: Royal Society of Chemistry journal article supplement (doi:10.1039/d5ma01472g)
Supplement: d5ma01472g1.pdf [file d5ma01472g1.pdf]

Supporting Information

**A High-Capacity 2.5 V Aqueous  $K^+/Zn^{2+}$  Mixed Ions Hybrid  
Supercapacitor Enabled by an Electrochemically Pre-Intercalated  
 $\alpha$ - $MnO_2$ /Carbon Black Cathode**

Raghupathy Rajesh,<sup>a,b</sup> Annamalai Senthil Kumar<sup>a,b\*</sup>

*<sup>a</sup>Nano and Bioelectrochemistry Research Laboratory, CO<sub>2</sub> Research and Green Technologies  
Centre and <sup>b</sup>Department of Chemistry, School of Advanced Sciences, Vellore Institute of  
Technology University and Vellore – 632 014, Tamil Nadu, India*

*\*Corresponding (askumar) author's emails: askumarchem@yahoo.com & askumar@vit.ac.in*

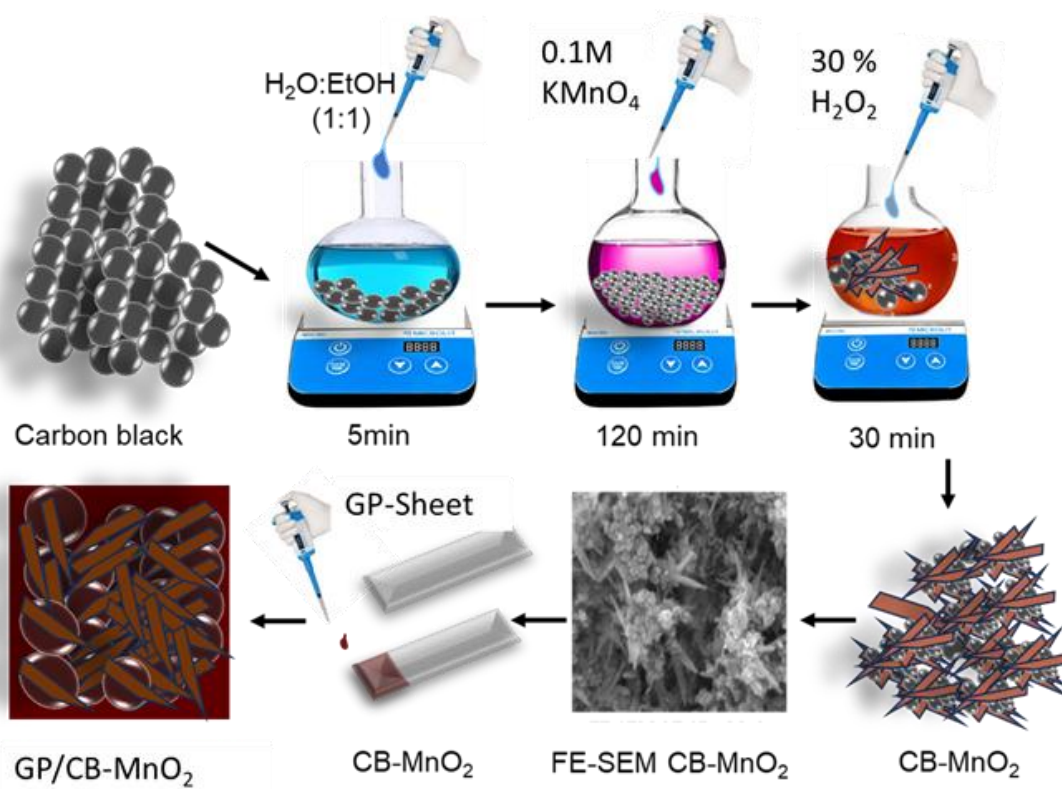

**Supporting Scheme 1.** Systematic synthesis procedure of CB- $\text{MnO}_2$

Supporting Table S1. Comparison of Raman shifts various optimal and control materials

| System                                        | D band/<br>cm <sup>-1</sup> | G band/<br>cm <sup>-1</sup> | $\alpha$ -MnO <sub>2</sub> /<br>cm <sup>-1</sup> | ZnO/ cm <sup>-1</sup> | I <sub>D</sub> /I <sub>G</sub> |
|-----------------------------------------------|-----------------------------|-----------------------------|--------------------------------------------------|-----------------------|--------------------------------|
| <b>1. CB</b>                                  | 1354                        | 1596                        | -                                                | -                     | 0.63                           |
| <b>2. <math>\alpha</math>-MnO<sub>2</sub></b> | -                           | -                           | 660, 550,<br>480                                 | -                     | -                              |
| <b>3. CB-MnO<sub>2</sub></b>                  | 1340                        | 1610                        | 570, 644                                         | -                     | 1.19                           |
| <b>4. CB-MnO<sub>2</sub>@Zn</b>               | 1349                        | 1591                        | 660                                              | 430                   | 1.04                           |

Supporting Table S2. Comparison of various MnO<sub>2</sub> based supercapacitors reported in the literature

| S.No | Electrode                                            | Electrolyte                                           | Operation Potential (V) | Capacitance @ Current density                      | Capacitance retention (Cycles) | Ref              |
|------|------------------------------------------------------|-------------------------------------------------------|-------------------------|----------------------------------------------------|--------------------------------|------------------|
| 1    | CFP- $\alpha$ -MnO <sub>2</sub>                      | 1 M NaSO <sub>4</sub>                                 | 0 – 1                   | 472 Fg <sup>-1</sup> @ 1 Ag <sup>-1</sup>          | 92% (10000)                    | S1               |
| 2    | $\alpha$ -MnO <sub>2</sub> @rGO                      | PVA+CMC+EG                                            | 0 – 2                   | 575.5 mFg <sup>-1</sup><br>@ 6 mA cm <sup>-2</sup> | 89.1% (5000)                   | S2               |
| 3    | g-CN/ MnO <sub>2</sub>                               | 2 M KOH                                               | 0 – 0.5                 | 148.66 Fg <sup>-1</sup> @ 0.5 Ag <sup>-1</sup>     | 50% (3000)                     | S3               |
| 4    | NMOC                                                 | 1 M NaSO <sub>4</sub>                                 | 0 – 1.2                 | 182 Fg <sup>-1</sup> @ 1 Ag <sup>-1</sup>          |                                | S4               |
| 5    | $\alpha$ -MnO <sub>2</sub>                           | 1 M NaSO <sub>4</sub>                                 | 0 – 1                   | 324 Fg <sup>-1</sup> @ 0.5 Ag <sup>-1</sup>        | 82% (5000)                     | S5               |
| 6    | MnO <sub>2</sub> /rGO                                | 1 M NaSO <sub>4</sub>                                 | -0.1 – 0.9              | 381 Fg <sup>-1</sup> @ 5 Ag <sup>-1</sup>          | 84% (2000)                     | S6               |
| 7    | CD/CNF@MnO <sub>2</sub>                              | 6 M KOH                                               | -0.2 – 0.8              | 235 Fg <sup>-1</sup> @ 1 mA cm <sup>-2</sup>       | 96% (10000)                    | S7               |
| 8    | AMCM-4                                               | 1 M NaSO <sub>4</sub>                                 | -1 – 0                  | 450 Fg <sup>-1</sup> @ 1 Ag <sup>-1</sup>          | 92.3% (5000)                   | S8               |
| 9    | MnO <sub>2</sub> /MnO@CF                             | 1 M NaSO <sub>4</sub>                                 | 0 – 1                   | 216 Fg <sup>-1</sup> @ 1 Ag <sup>-1</sup>          | 100% (10000)                   | S9               |
| 10   | MnO <sub>2</sub> -g-C <sub>3</sub> N <sub>4</sub> /C | 3 M KOH                                               | 0 – 0.6                 | 276 Fg <sup>-1</sup> @ 0.5 Ag <sup>-1</sup>        | 96% (1000)                     | S10              |
| 11   | N-PCH@WC-Mn                                          | 6 M KOH                                               | 0 – 1                   | 434 Fg <sup>-1</sup> @ 1 mA cm <sup>-2</sup>       | 96% (10000)                    | S11              |
| 12   | G-HMC                                                | 6 M KOH                                               | -1 – 0                  | 770.8 Fg <sup>-1</sup> @ 0.5 Ag <sup>-1</sup>      |                                | S12              |
| 13   | MnO <sub>2</sub> /PAC                                | 1 M NaSO <sub>4</sub>                                 | -1 – 0                  | 208.75 Fg <sup>-1</sup> @ 1 Ag <sup>-1</sup>       | 87.43% (5000)                  | S13              |
| 14   | ZnMO@CC                                              | 1 M NaSO <sub>4</sub>                                 | 0 – 1                   | 667 Fg <sup>-1</sup> @ 1 Ag <sup>-1</sup>          |                                | S14              |
| 15   | MnO <sub>2</sub> -BPCs                               | 0.5 M (NH <sub>4</sub> ) <sub>2</sub> SO <sub>4</sub> | -1 – 0                  | 223.2 Fg <sup>-1</sup> @ 0.5 Ag <sup>-1</sup>      | 85% (10000)                    | S15              |
| 16   | RAC/MnO <sub>2</sub>                                 | 6 M KOH                                               | -1 – 0.2                | 673 Fg <sup>-1</sup> @ 1 Ag <sup>-1</sup>          |                                | S16              |
| 17   | WRC-MnO <sub>2</sub>                                 | 1 M NaSO <sub>4</sub>                                 | 0 – 0.8                 | 214 Fg <sup>-1</sup> @ 1 mA cm <sup>-2</sup>       | 85.27% (5000)                  | S17              |
| 18   | $\delta$ -MnO <sub>2</sub> @CC                       | 0.5 M NaSO <sub>4</sub>                               | 0 – 0.9                 | 205 Fg <sup>-1</sup> @ 1 mA cm <sup>-2</sup>       |                                | S18              |
| 19   | A-MnO <sub>2</sub> /CC                               | 1 M NaSO <sub>4</sub>                                 | 0 – 1                   | 202 Fg <sup>-1</sup> @ 5 mA cm <sup>-2</sup>       |                                | S19              |
| 20   | MnO <sub>2</sub> /BC                                 | 1 M NaSO <sub>4</sub>                                 | 0 – 1                   | 205.5 Fg <sup>-1</sup> @ 0.5 Ag <sup>-1</sup>      | 96.1% (1000)                   | S20              |
| 21   | <b>CB-<math>\alpha</math>-MnO<sub>2</sub>@Zn</b>     | <b>1 mM ZnSO<sub>4</sub> + 0.1 M KCl</b>              | <b>0 – 1</b>            | <b>811.66 Fg<sup>-1</sup> @ 1 Ag<sup>-1</sup></b>  | <b>80% (5000)</b>              | <b>This work</b> |

Supporting Table S3. Comparison of various MnO<sub>2</sub> based battery works reported in literature

| S.No | Preparation method             | Cathode                               | Electrolyte                                     | Operation Potential (V) | Capacity/ Current density                         | Energy Density             | Power Density             | Capacity Retention (cycles) | Ref |
|------|--------------------------------|---------------------------------------|-------------------------------------------------|-------------------------|---------------------------------------------------|----------------------------|---------------------------|-----------------------------|-----|
| 1    | Hydrothermal & electrochemical | $\gamma$ -MnO <sub>2</sub> @CP        | 2 M ZnSO <sub>4</sub> + 0.1 M MnSO <sub>4</sub> | 0.8 - 1.8               | 391 mAh g <sup>-1</sup> @ 0.1 Ag <sup>-1</sup>    | 553.12 Wh kg <sup>-1</sup> | -                         | 92.17% (3000)               | S21 |
| 2    | Laser modification             | Gr- MnO <sub>2</sub>                  | 2 M ZnSO <sub>4</sub> + 0.1 M MnSO <sub>4</sub> | 1 - 2                   | 233 mAh g <sup>-1</sup> @ 1 Ag <sup>-1</sup>      | -                          | -                         | 71% (1000)                  | S22 |
| 3    | Hydrothermal                   | C@MnO <sub>2</sub> -NFs               | 2 M ZnSO <sub>4</sub> + 0.1 M MnSO <sub>4</sub> | 0.8 - 2                 | 402 mAh g <sup>-1</sup> @ 0.2 Ag <sup>-1</sup>    | 224.2 Wh kg <sup>-1</sup>  | 121 W kg <sup>-1</sup>    | 95% (1000)                  | S23 |
| 4    | Hydrothermal                   | MnO-C@C                               | 2 M ZnSO <sub>4</sub> + 0.1 M MnSO <sub>4</sub> | 0.3 - 1.8               | 409 mAh g <sup>-1</sup> @ 50 mAg <sup>-1</sup>    |                            |                           | 88% (1000)                  | S24 |
| 5    | Hydrothermal                   | NC@Mn <sub>3</sub> O <sub>4</sub>     | 2 M ZnSO <sub>4</sub> + 0.1 M MnSO <sub>4</sub> | 0.8 – 1.8               | 420 mAh g <sup>-1</sup> @ 1 Ag <sup>-1</sup>      |                            |                           | 90.34% (1000)               | S25 |
| 6    | Hydrothermal                   | CNT@ $\beta$ -MnO <sub>2</sub>        | 2 M ZnSO <sub>4</sub> + 0.1 M MnSO <sub>4</sub> | 0.8 – 1.9               | 259 mAh g <sup>-1</sup> @ 3 Ag <sup>-1</sup>      |                            |                           | 96% (2000)                  | S26 |
| 7    | Hydrothermal                   | N-doped MnO <sub>2</sub> -C           | 2 M ZnSO <sub>4</sub> + 0.2 M MnSO <sub>4</sub> | 0.8 – 1.8               | 339 mAh g <sup>-1</sup> @ 0.1 Ag <sup>-1</sup>    |                            |                           | 82.8% (1000)                | S27 |
| 8    | Hydrothermal                   | K-MnO <sub>2</sub> /CC                | 2 M ZnSO <sub>4</sub> + 0.4 M MnSO <sub>4</sub> | 1 – 1.8                 | 3.54 mAh cm <sup>-2</sup> @ 1 mA cm <sup>-2</sup> | 198.6 Wh kg <sup>-1</sup>  | 118.8 kW kg <sup>-1</sup> | 72.2% (1000)                | S28 |
| 9    | Electrodeposition              | PANI-MnO <sub>2</sub> /CC             | 2 M ZnSO <sub>4</sub> + 0.2 M MnSO <sub>4</sub> | 0.8 – 1.9               | 285 mAh g <sup>-1</sup> @ 0.5 Ag <sup>-1</sup>    | 333.3 Wh kg <sup>-1</sup>  | 588.6 W kg <sup>-1</sup>  | 61.7% (800)                 | S29 |
| 10   | Hydrothermal                   | CA@MnO <sub>2</sub>                   | 2 M ZnSO <sub>4</sub> + 0.2 M MnSO <sub>4</sub> | 1 – 1.9                 | 480 mAh g <sup>-1</sup> @ 0.5 Ag <sup>-1</sup>    | 420 Wh kg <sup>-1</sup>    | 6.5 kW kg <sup>-1</sup>   | 88% (1000)                  | S30 |
| 11   | Ball milling                   | $\beta$ -MnO <sub>2</sub> /3D GPE-CNT | 2 M ZnSO <sub>4</sub> + 0.5 M MnSO <sub>4</sub> | 1 – 1.8                 | 521 mAh g <sup>-1</sup> @ 100 mAg <sup>-1</sup>   |                            |                           | 83% (8000)                  | S31 |
| 12   | Hydrothermal                   | Mn <sub>2</sub> O <sub>3</sub> /CDs   | 3 M ZnSO <sub>4</sub> + 0.2 M MnSO <sub>4</sub> | 0.8 – 1.8               | 252 mAh g <sup>-1</sup> @ 0.1 Ag <sup>-1</sup>    |                            |                           | 71.6% (1000)                | S32 |
| 13   | Hydrothermal & coprecipitation | MC-MnO <sub>2</sub>                   | 2 M ZnSO <sub>4</sub> + 0.1 M MnSO <sub>4</sub> | 0.6 – 1.9               | 227 mAh g <sup>-1</sup> @ 0.2 Ag <sup>-1</sup>    |                            |                           | 86% (3000)                  | S33 |
| 14   | Hydrothermal & coprecipitation | $\beta$ -MnO <sub>2</sub> -MWCNT      | 3 M ZnSO <sub>4</sub> + 0.1 M MnSO <sub>4</sub> | 0.8 – 1.8               | 505 mAh g <sup>-1</sup> @ 0.1 Ag <sup>-1</sup>    |                            |                           | 93.5% (1000)                | S34 |

|    |                                                |                                                                 |                                                                                                   |                   |                                                          |                                     |                                     |                       |                      |
|----|------------------------------------------------|-----------------------------------------------------------------|---------------------------------------------------------------------------------------------------|-------------------|----------------------------------------------------------|-------------------------------------|-------------------------------------|-----------------------|----------------------|
| 15 | Hydrothermal                                   | FMO-CC                                                          | 0.3 M<br>MnSO <sub>4</sub><br>2 M<br>ZnSO <sub>4</sub> <sup>+</sup><br>0.5 M<br>MnSO <sub>4</sub> | 0 – 1.8           | 288 mAh g <sup>-1</sup><br>@ 1 Ag <sup>-1</sup>          | 47 Wh<br>kg <sup>-1</sup>           | 995<br>W kg <sup>-1</sup>           | 72%<br>(5000)         | S35                  |
| 16 | Hydrothermal<br>&<br>coprecipitation           | MnO <sub>2</sub> /Mn <sub>2</sub><br>O <sub>3</sub> -<br>GO/CNF | 6 M KOH                                                                                           | 0 – 1.5           | 222.2 mAh g <sup>-1</sup><br>@ 1 Ag <sup>-1</sup>        | 24 Wh<br>kg <sup>-1</sup>           | 1554.4<br>W kg <sup>-1</sup>        | 92%<br>(5000)         | S36                  |
| 17 | <b>Simple Co-<br/>precipitation<br/>method</b> | <b>CB-<math>\alpha</math>-<br/>MnO<sub>2</sub>@Z<br/>n</b>      | <b>1 mM<br/>ZnSO<sub>4</sub> +<br/>0.1 M KCl</b>                                                  | <b>-0.2 – 2.5</b> | <b>315 mAh g<sup>-1</sup><br/>@ 0.25 Ag<sup>-1</sup></b> | <b>273.4<br/>Wh kg<sup>-1</sup></b> | <b>1844.4<br/>W kg<sup>-1</sup></b> | <b>94%<br/>(5000)</b> | <b>This<br/>work</b> |

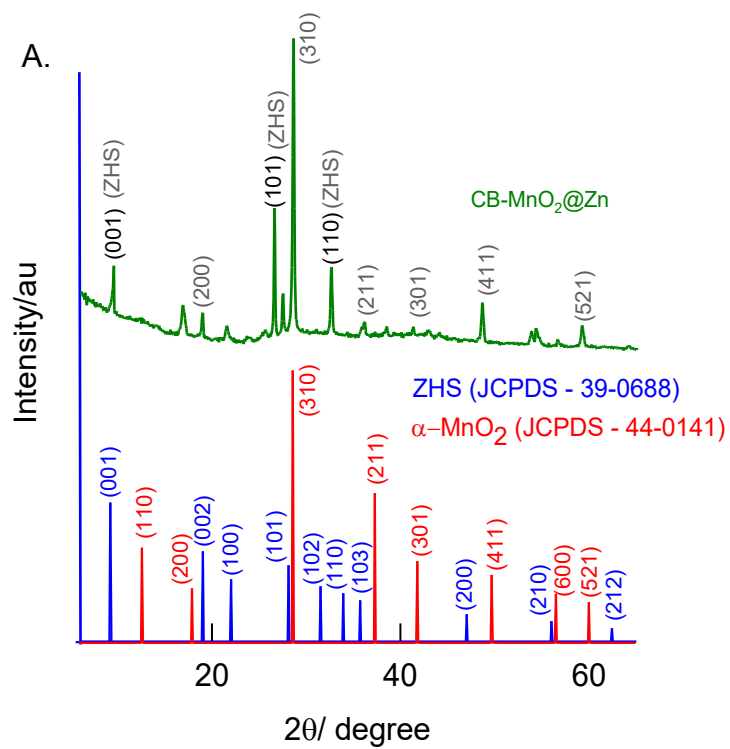

**Supporting Figure S1.** XRD analysis of CB-MnO<sub>2</sub>@Zn and its corresponding JCPDS data.

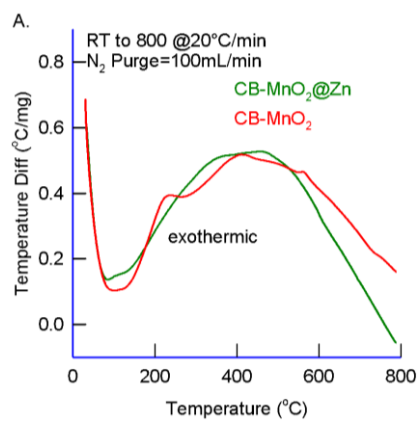

**Supporting Figure S2.** DTA analysis of CB-MnO<sub>2</sub> and CB-MnO<sub>2</sub>@Zn.

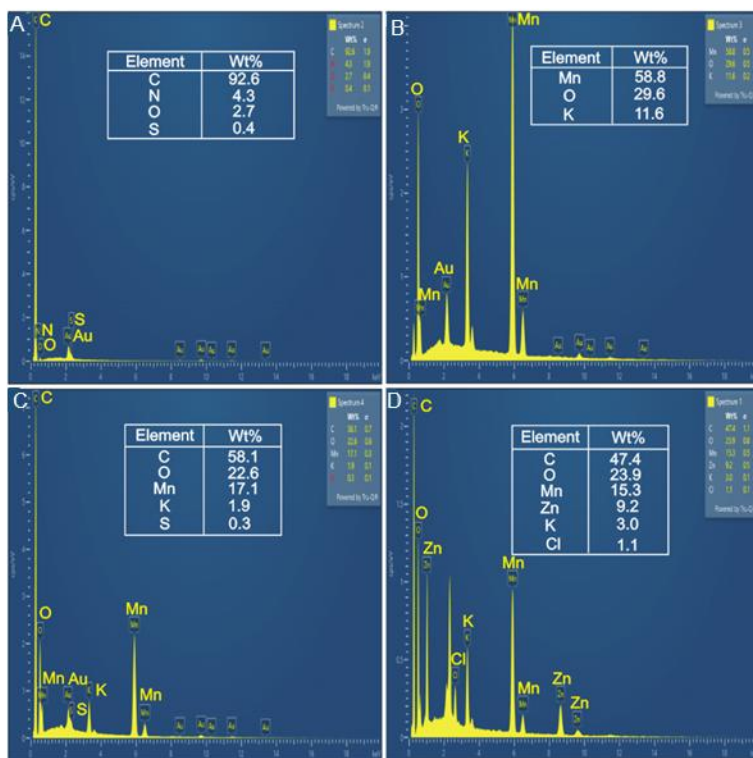

**Supporting Figure S3.** FESEM EDX analysis of (A) CB, (B) MnO<sub>2</sub>, (C) CB-MnO<sub>2</sub> and (D) CB-MnO<sub>2</sub>@Zn.

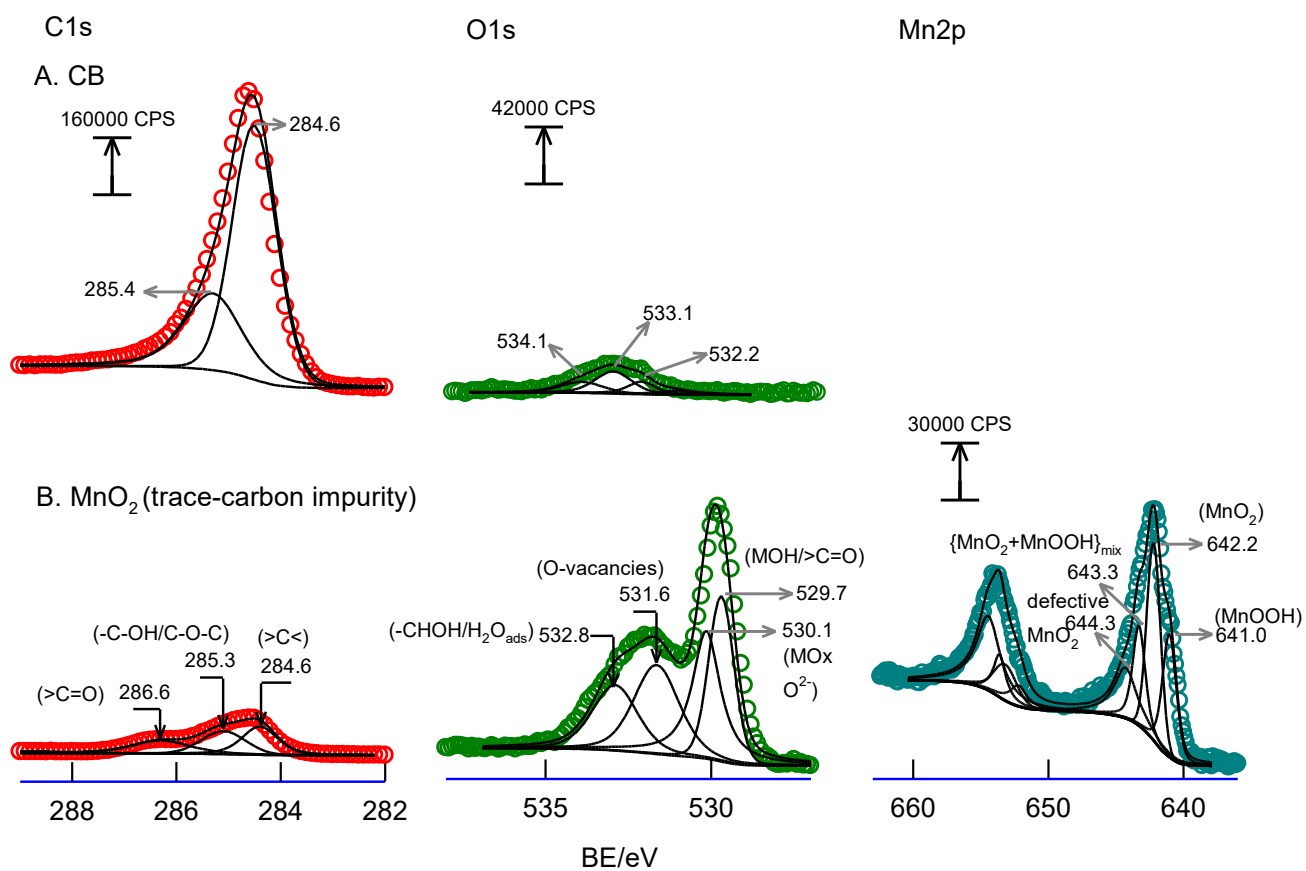

**Supporting Figure S4.** XPS analysis of (A) CB and (B) MnO<sub>2</sub> for the elements C1s, O1s, Mn2p.

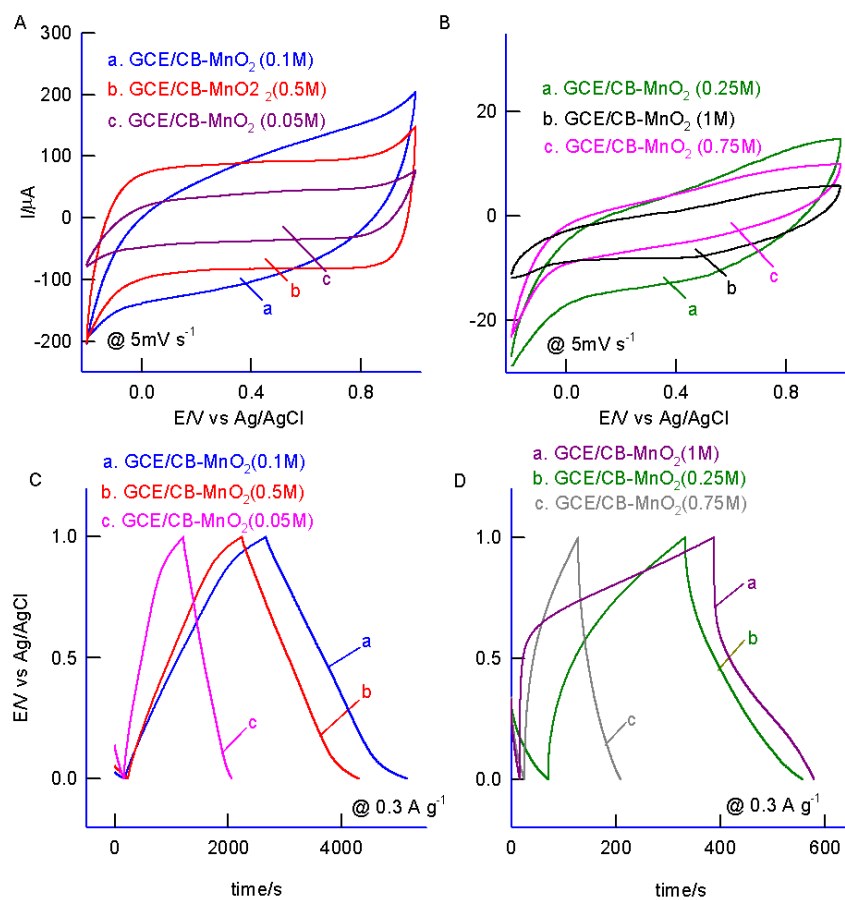

**Supporting Figure S5.** Cyclic voltammetric (A-B) and GCD (C-D) response of different concentrations of CB-MnO<sub>2</sub>, 0.1 M (curve a), 0.5 M (curve b), 0.05 M (curve c) and (B) 0.25 M (curve a), 1 M (curve b) and 0.75 M (curve c).

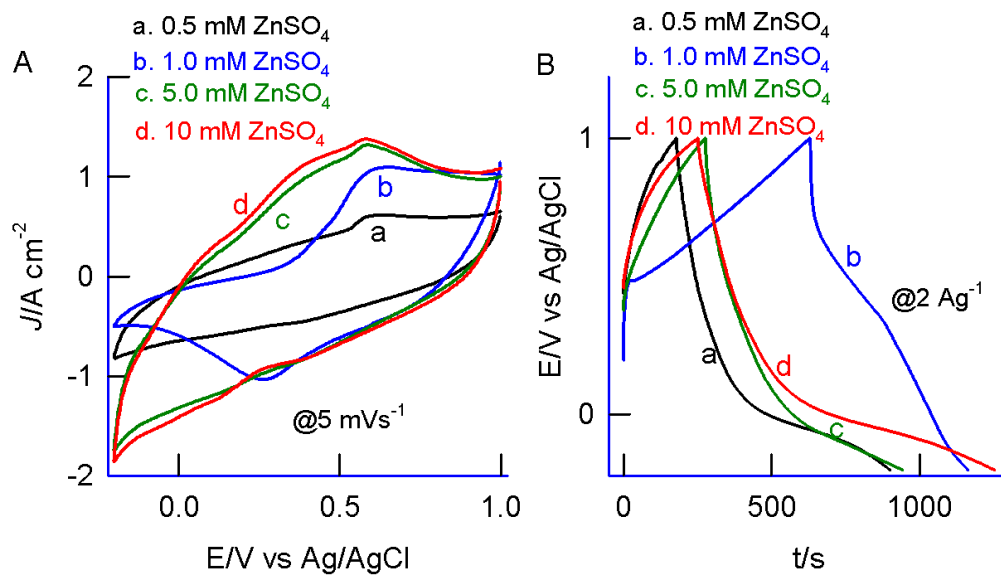

**Supporting Figure S6.** Optimization of the suitable Zn<sup>2+</sup> concentration in 0.1 M KCl of CB-MnO<sub>2</sub> cathode using (A) CV, and (B) GCD.

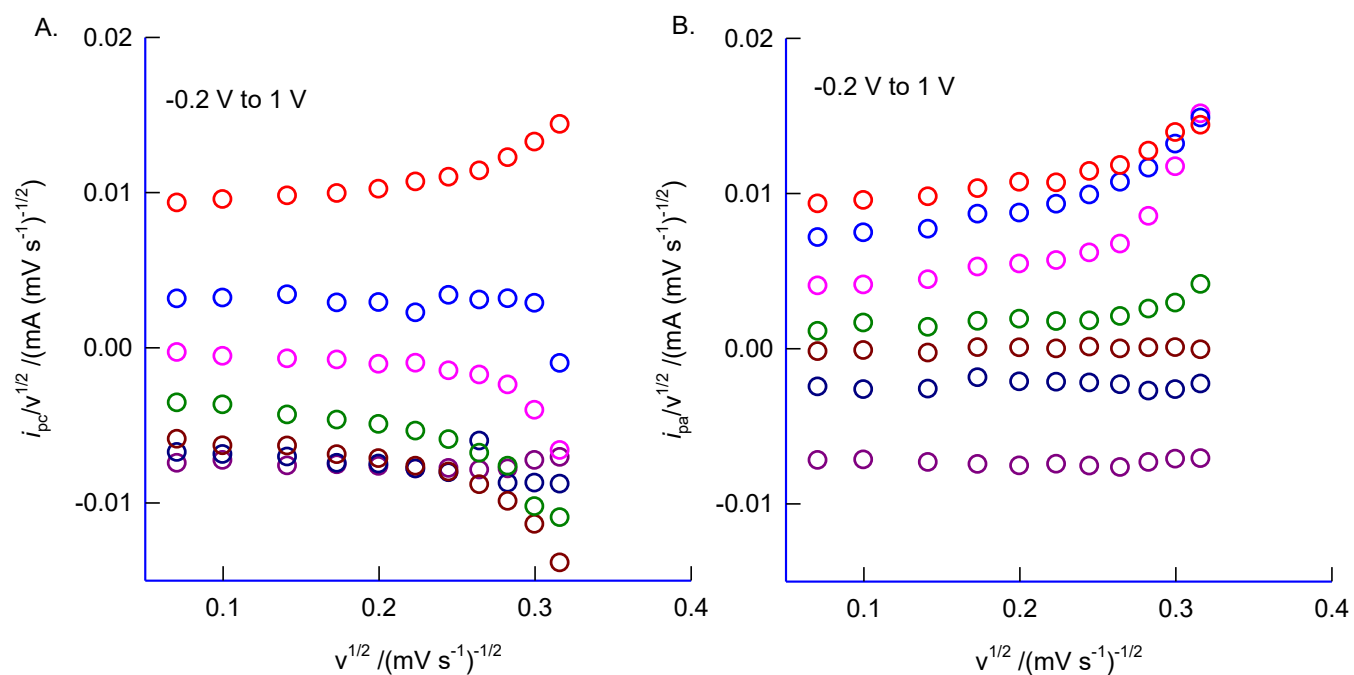

**Supporting Figure S7.** Analysis of voltammetric sweep data for CB-MnO<sub>2</sub>@Zn, sweep rates = 5 mV s<sup>-1</sup> to 100 mV s<sup>-1</sup>.

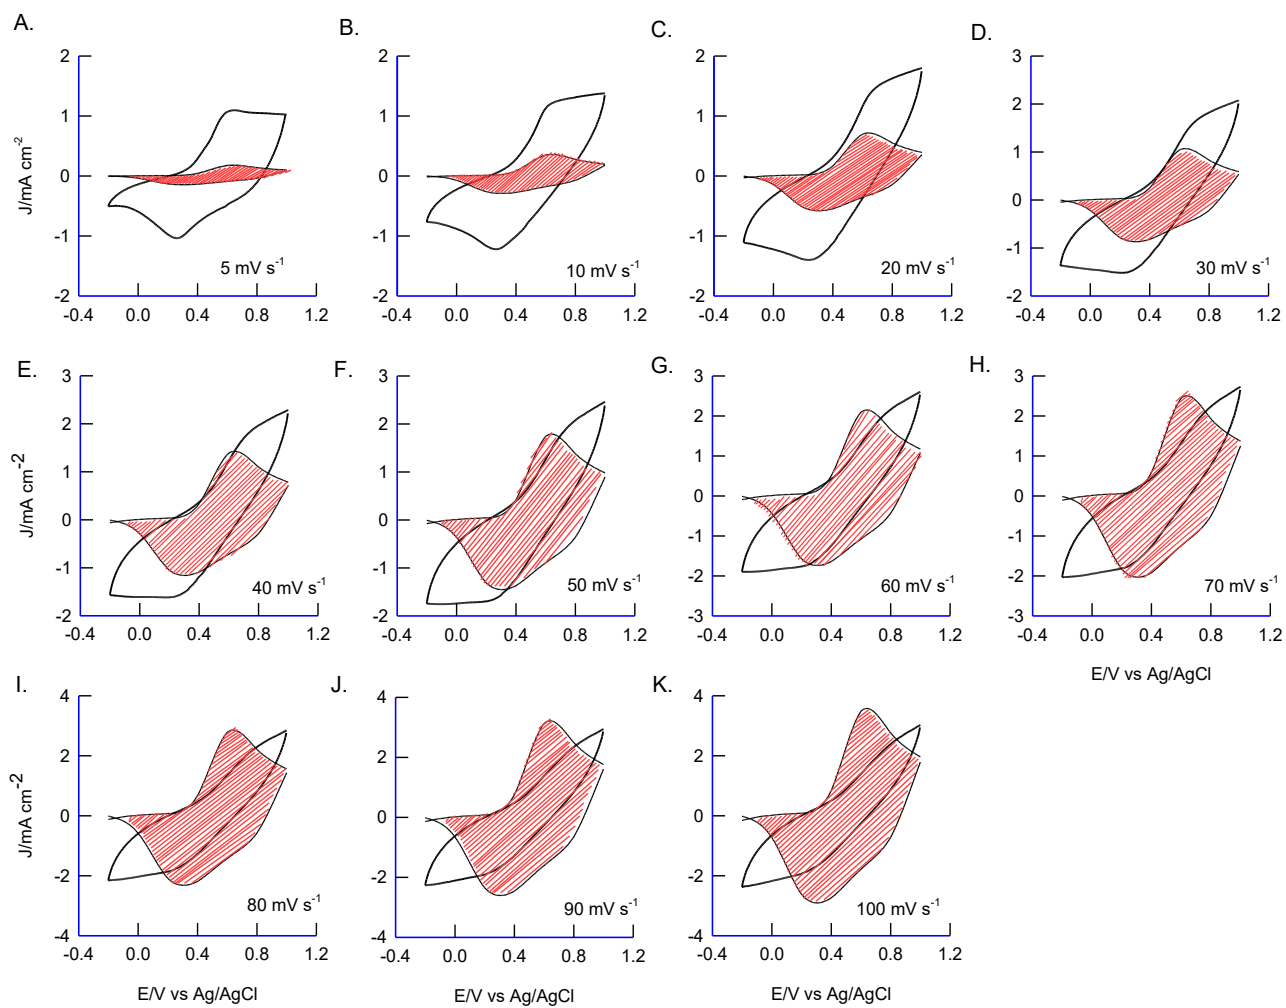

**Supporting Figure S8.** Dunn's method analysis of capacitive and diffusion contribution of CB-MnO<sub>2</sub>@Zn in 0.1 M KCl + 1 mM ZnSO<sub>4</sub> (shaded region = pseudocapacitive contribution).

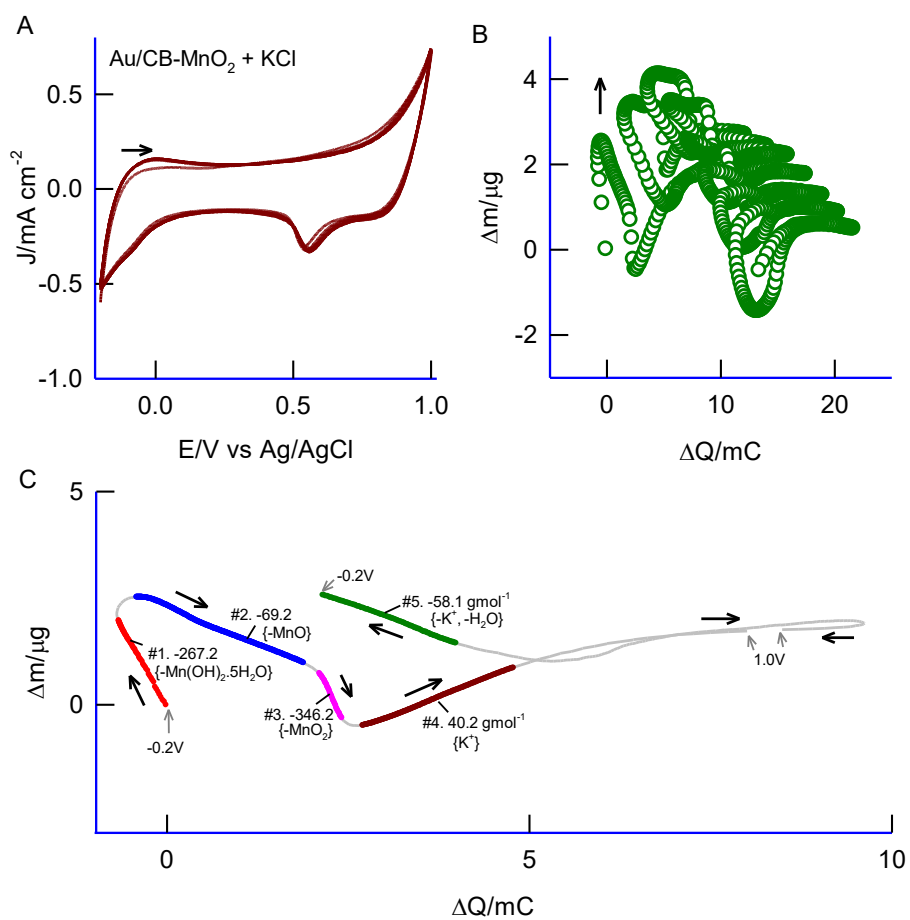

**Supporting Figure S9.** EQCM responses of Au/CB-MnO<sub>2</sub> (A-C) 0.1M KCl.

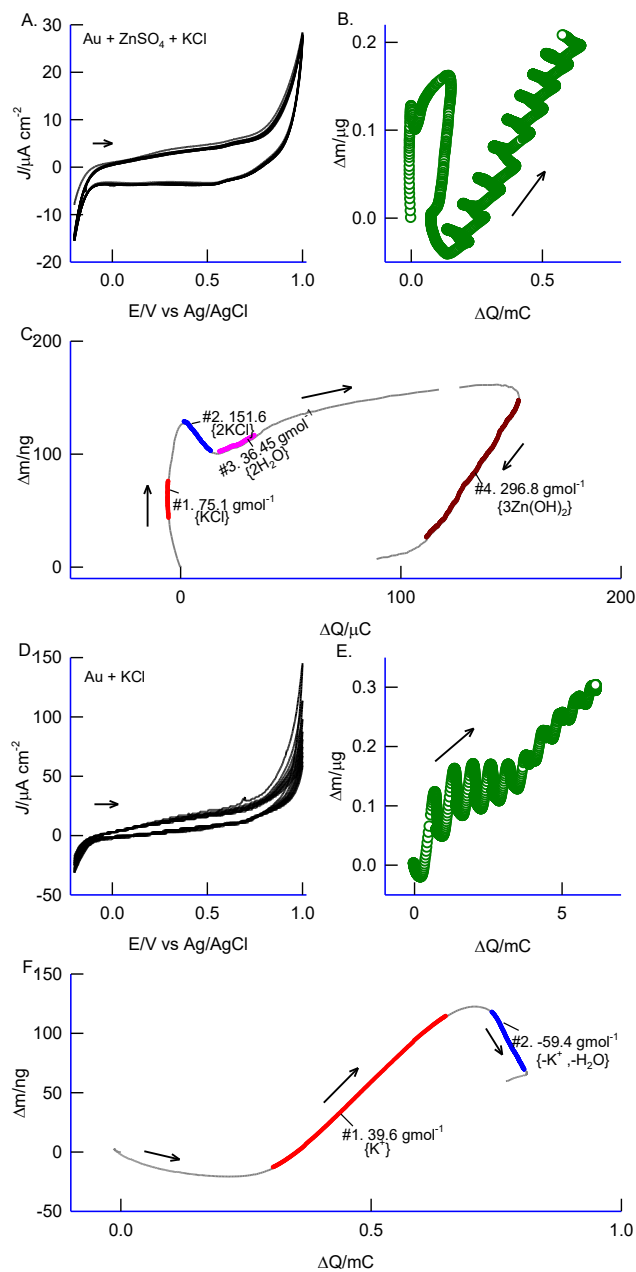

**Supporting Figure S10.** EQCM responses of EQCM-Au electrode with (A-C) without (D-F)  $\text{ZnSO}_4$  containing 0.1M KCl

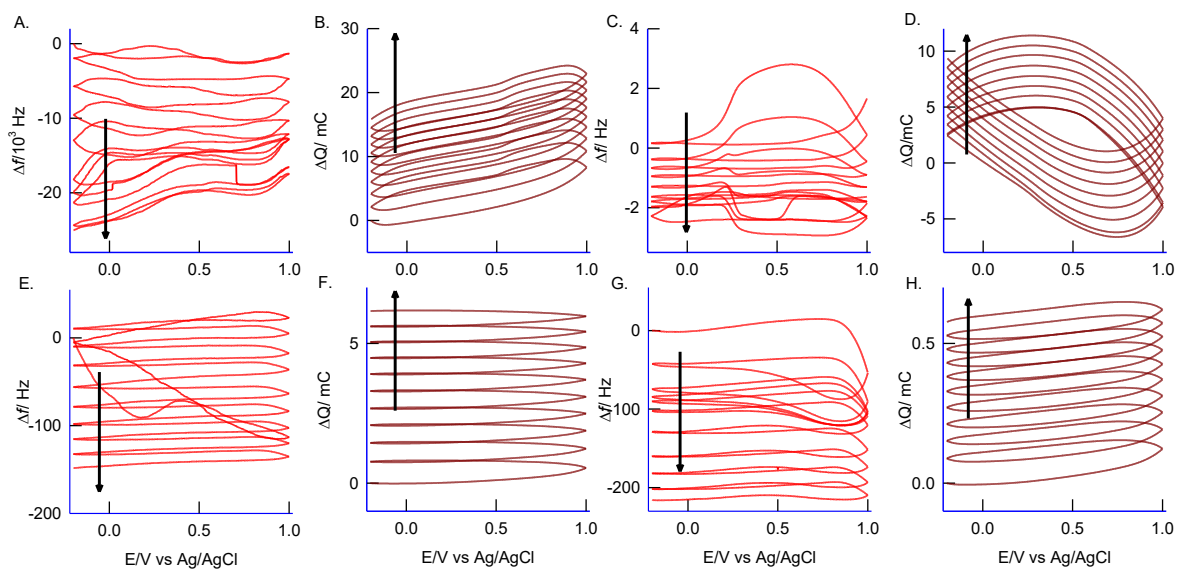

**Supporting Figure S11.** EQCM responses of Potential vs frequency and charge. Au/CB-MnO<sub>2</sub> electrode in with (A-B) and without (C-D) ZnSO<sub>4</sub> containing 0.1M KCl. EQCM-Au electrode with (E-F), ZnSO<sub>4</sub> and without (G-H) in KCl.

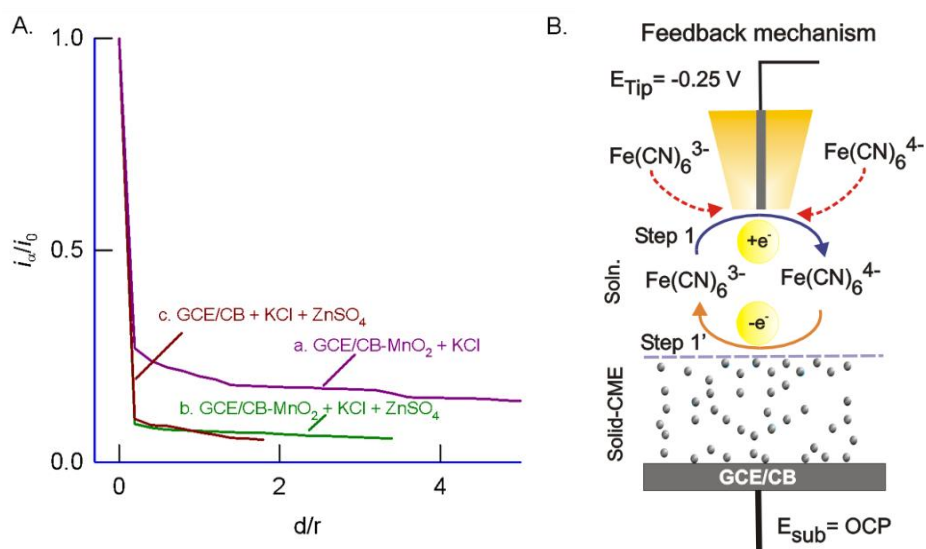

**Supporting Figure S12. (A)** SECM approach curves of different electrodes in with and without  $\text{Zn}^{2+}$  containing KCl. **(B)** Systematic representation of (feedback mode mechanism) GCE/CB in KCl +  $\text{ZnSO}_4$ .

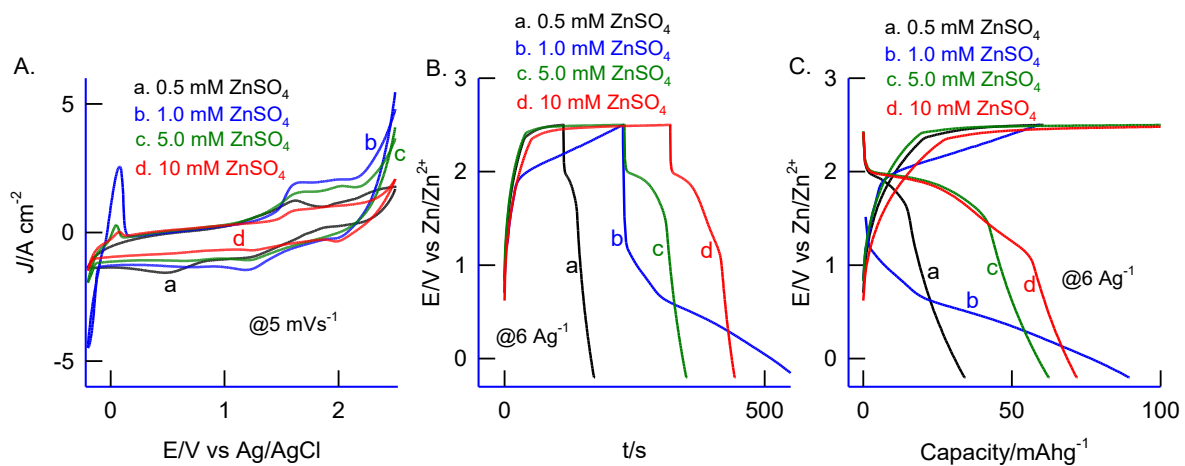

**Supporting Figure S13.** Regulating the Zn<sup>2+</sup> concentration in (A) CV and (B&C) GCD experiments

## Sup Info References

- [S1] X. Su, Z. Liang, Q. He, Y. Guo, G. Luo, S. Han, L. Yu, *Nanotechnology* 2024, **35**, 265402.
- [S2] Y. Bai, K. Li, L. Wang, Y. Gao, X. Li, X. Yang, W. Lü, *J. Power Sources*, 2024, **591**, 233878.
- [S3] M. Shin, K. P. Sharma, K. Kim, G. P. Awasthi, C. Yu, *J. Phys. Chem. Solids*, 2023, **177**, 111310.
- [S4] Q. Gou, J. Xu, H. Luo, J. Wang, B. Zhang, J. Deng, N. A. N. Ouedraogo, Y. Zheng, S. Lu, J. Xiao, K. Sun, M. Li, *Electrochim. Acta*, 2022, **431**, 141127.
- [S5] T. Xu, K. Yin, J. Gu, Q. Li, Z. Fang, Z. Chen, Y. Wang, N. Qu, S. Li, Z. Xiao, D. Wang, *Langmuir*, 2022, **38**, 12530.
- [S6] H.J. Lee, N. Noor, C. Gumecci, N. Dale, J. Parrondo, D. C. Higgins, *J. Phys. Chem. C*, 2022, **126**, 13004.
- [S7] S. I. Yun, J.-W. Song, B.-H. Kim, *ACS Appl. Nano Mater.* **2022**, *5*, 5688.
- [S8] S. Zhao, X. Kang, H. Fan, C. Si, X. Song, *Microporous and Mesoporous Materials* **2022**, *329*, 111518.
- [S9] X. Du, C. Hou, H. Kimura, J. Song, X. Yang, X. Xie, H. Jiang, X. Zhang, X. Sun, Y. Zhang, S. Gao, W. Du, *J. Colloid Interf. Sci.* 2024, **673**, 92.
- [S10] C. Wenyu, L. Chengbao, Z. Leizhi, C. Feng, Q. Junchao, Q. Yongbin, M. Xianrong, C. Zhigang, *Chem. Phys. Lett.* 2024, **849**, 141422.
- [S11] F. Zhao, L. Lin, J. Zhang, J. Liu, *J. Energy Storage*, 2024, **95**, 112631.
- [S12] R. Li, Y. Lu, X. Lyu, D. Pan, G. Xiao, Z. Hu, J. Hu, Y. Xu, *J. Energy Storage*, 2024, **92**, 112196.
- [S13] Y. S. Lee, A. R. Selvaraj, N. Kostoglou, C. Rebholz, R. Rajendiran, V. Raman, H. Kim, J. A. Rajesh, V. M. Nagulapati, T. H. Oh, P. Jerome, S.-S. Kim, *Mater. Sci. Eng. B*, 2024, **304**, 117368.
- [S14] S. Abbas, T. H. Bokhari, A. Zafar, S. Javed, S. Karim, H. Sun, S. Hussain, A. Khalid, Y. Yu, R. T. A. Khan, I. Ullah, A. Nisar, M. Ahmad, *J. Energy Storage*, 2024, **87**, 111455.
- [S15] L. Chen, Z. Zhang, X. Zhang, D. Wang, *Diamond and Related Materials*, 2024, **145**, 11142.
- [S16] H. Wang, H. Wang, C. Hu, Y. Cheng, L. Yao, F. Ruan, Q. Feng, C. Chu, T. Lin, H. Wang, *J. Energy Storage*, 2024, **84**, 110960.

- [S17] X. Shan, L. Wang, L. Li, Y. Zuo, Z. Fu, J. Wu, Z. Wang, X. Zhang, X. Wang, *iScience* 2024, **27**, 109228.
- [S18] X. Zhang, J. Wei, L. Wang, S. Wang, Y. Zhang, J. Wen, D. Shi, X. Zhang, X. Li, Y. Ma, Q. Pan, *Electrochim. Acta.* 2024, **474**, 143543.
- [S19] Y. Wang, H. Quan, Q. Zhang, B. Tan, W. Chen, D. Chen, *ACS Appl. Nano Mater.* 2024, **7**, 27988.
- [S20] X. Zhao, N. Wang, L. Li, Z. Fang, S. Tang, J. Gu, *J. Chem.* 2024, **1**.
- [S21] W. Lv, Z. Shen, X. Li, J. Meng, W. Yang, F. Ding, X. Ju, F. Ye, Y. Li, X. Lyu, M. Wang, Y. Tian, C. Xu, *Nano-Micro Lett.* 2024, **16**, 109.
- [S22] M. M. Mohamed, Y. P. Hardianto, A. Hussain, S. A. Ganiyu, M. A. Gondal, Md. A. Aziz, *Appl. Surf. Sci.* 2024, **669**, 160472.
- [S23] Y. Xiong, Y. Kong, L. Xu, H. Li, Y. Zhong, B. He, M. Wang, L. Jin, W. Lu, H. Wang, *J. Energy Storage* 2024, **97**, 112985.
- [S24] H. Xu, M. Li, P. Guo, W. Yang, C. Li, H. Wang, W. Peng, L. Jiapeng, *Carbon*, 2024, **228**, 119403.
- [S25] M. Xie, X. Zhang, R. Wang, Y. Jiao, Z. Shu, S. Shan, Y. Bian, H. Lin, J. Chen, Y. Xu, *Chem. Eng. J.* 2024, **494**, 152908.
- [S26] L. Li, C. Yin, R. Han, F. Zhong, J. Hu, *Inorg. Chem.* 2024, **63**, 13100.
- [S27] H. Zhang, Z. Shen, D. Jia, W. Zhou, X. Wang, J. Liu, X. He, *J. Alloys Comp.* 2024, **991**, 174413.
- [S28] Q. Chen, J. Li, C. Liao, W. Liang, X. Lou, Z. Liu, J. Zhang, Y. Tang, L. Mai, L. Zhou, K. Amine, *Nano Energy*, 2024, **126**, 109607.
- [S29] S. Xi, X. Cheng, X. Gao, X. Qian, *ACS Appl. Energy Mater.* 2024, **7**, 5081.
- [S30] Q. Zhao, H. Zhang, X. Wang, T. Xu, M. Zhang, Y. Wang, L. Zhu, S. Tong, X. Zhou, J. Li, W. Huan, Z. Huang, C. Si, *Adv. Compos. Hybrid Mater.* 2024, **7**, 90.
- [S31] D. Jin, X. Dong, S. Xin, L. Yang, J. Liu, Q. Pang, *Ionics* 2024, **30**, 3329.
- [S32] L. Lan, Q. Li, G. Gu, H. Zhang, B. Liu, *J. Alloys Comp.* 2015, **644**, 430.
- [S33] J. Li, X. Yang, D. Ma, J. Liu, C. Ma, N. Liu, L. Lu, T. Wang, X. Pang, Y. Yang, Q. Zhang, X. Li, *J. Colloid Interf. Sci.* 2024, **676**, 927.
- [S34] C. Deng, Y. Nie, X. Yuan, T. Zou, J. Wang, H. Gao, E. Ye, *Solid State Ionics*, 2024, **406**, 116476.
- [S35] Z. Tian, Z. Zhao, Y. Chen, D. Li, Y. Wang, X. Wang, L. Guo, *J. Alloys Comp.* 2022, **925**, 166682.

- [S36] N. Roy, G. Rajasekhara Reddy, M. R. Pallavolu, R. R. Nallapureddy, M. Dhananjaya, A. Sai Kumar, A. N. Banerjee, B.-K. Min, H. R. Barai, S. W. Joo, *ACS Appl. Mater. Interf.* 2024, **16**, 34859.
